# Supplementary material for: Efficacy and Safety of the Cudrania tricuspidata Extract on Functional Dyspepsia: A Randomized Double-Blind Placebo-Controlled Multicenter Study
Source: MDPI journal article supplement (doi:10.3390/jcm10225323), 2021-11-16
Supplement: s1 [file s1]

**Table S1.** The frequency scales of the Nepean Dyspepsia Index

|                                         |          | Intervention<br>group<br><i>n</i> = 39 | P-value* | Control<br>group<br><i>n</i> = 44 | P-value* | p-value** | p-value† |
|-----------------------------------------|----------|----------------------------------------|----------|-----------------------------------|----------|-----------|----------|
| Pain in the upper<br>abdomen            | Baseline | 5.77±3.25                              |          | 4.93±3.32                         |          | 0.324     |          |
|                                         | Day 28   | 3.23±2.50                              | <0.001   | 4.09±3.58                         | 0.042    | 0.001     | 0.006    |
|                                         | Day 56   | 1.82±2.13                              | <0.001   | 4.05±3.70                         | 0.059    | <0.001    | <0.001   |
| Discomfort in the<br>upper abdomen      | Baseline | 5.62±3.26                              |          | 5.34±2.98                         |          | 0.722     |          |
|                                         | Day 28   | 2.92±2.52                              | <0.001   | 5.02±3.25                         | 0.425    | <0.001    | <0.001   |
|                                         | Day 56   | 1.74±2.28                              | <0.001   | 4.55±3.54                         | 0.065    | <0.001    | <0.001   |
| Burning                                 | Baseline | 5.85±4.06                              |          | 5.18±3.13                         |          | 0.490     |          |
|                                         | Day 28   | 3.03±3.00                              | <0.001   | 4.70±3.68                         | 0.286    | <0.001    | <0.001   |
|                                         | Day 56   | 1.44±1.98                              | <0.001   | 4.55±3.27                         | 0.207    | <0.001    | <0.001   |
| Heartburn                               | Baseline | 4.13±3.47                              |          | 3.34±3.19                         |          | 0.254     |          |
|                                         | Day 28   | 2.00±2.35                              | <0.001   | 2.95±3.58                         | 0.458    | 0.022     | 0.029    |
|                                         | Day 56   | 0.64±1.33                              | <0.001   | 3.18±3.35                         | 0.752    | <0.001    | <0.001   |
| Cramps                                  | Baseline | 3.08±3.34                              |          | 2.70±3.17                         |          | 0.621     |          |
|                                         | Day 28   | 1.18±2.22                              | <0.001   | 2.80±3.45                         | 0.820    | 0.002     | <0.001   |
|                                         | Day 56   | 0.64±1.35                              | <0.001   | 2.59±4.02                         | 0.822    | 0.002     | 0.004    |
| Chest discomfort                        | Baseline | 3.59±3.49                              |          | 3.36±2.82                         |          | 0.955     |          |
|                                         | Day 28   | 1.97±2.28                              | 0.002    | 3.16±3.20                         | 0.562    | 0.032     | 0.007    |
|                                         | Day 56   | 0.85±1.42                              | <0.001   | 3.27±3.85                         | 0.853    | 0.002     | 0.002    |
| Inability to finish<br>a regular meal   | Baseline | 4.56±3.44                              |          | 4.41±3.91                         |          | 0.853     |          |
|                                         | Day 28   | 2.05±2.54                              | <0.001   | 3.95±3.60                         | 0.402    | 0.002     | 0.028    |
|                                         | Day 56   | 0.85±1.69                              | <0.001   | 4.14±3.97                         | 0.683    | <0.001    | <0.001   |
| Bitter-tasting<br>fluid in the<br>mouth | Baseline | 5.28±4.01                              |          | 4.93±3.31                         |          | 0.836     |          |
|                                         | Day 28   | 2.59±2.81                              | <0.001   | 4.43±3.53                         | 0.180    | <0.001    | 0.003    |
|                                         | Day 56   | 1.05±1.99                              | <0.001   | 4.36±3.89                         | 0.207    | <0.001    | <0.001   |
| Fullness after                          | Baseline | 7.56±3.02                              |          | 7.75±2.79                         |          | 0.765     |          |

|                               |          |           |        |           |       |        |        |
|-------------------------------|----------|-----------|--------|-----------|-------|--------|--------|
| eating                        | Day 28   | 4.49±2.46 | <0.001 | 6.73±2.97 | 0.010 | 0.002  | 0.002  |
|                               | Day 56   | 3.18±2.08 | <0.001 | 6.84±3.35 | 0.053 | <0.001 | <0.001 |
| Pressure in the upper abdomen | Baseline | 4.36±3.67 |        | 3.80±3.64 |       | 0.459  |        |
|                               | Day 28   | 2.05±2.33 | <0.001 | 3.80±3.75 | 1.000 | 0.001  | 0.018  |
|                               | Day 56   | 1.15±1.65 | <0.001 | 4.30±3.76 | 0.224 | <0.001 | <0.001 |
| Bloating                      | Baseline | 6.05±3.46 |        | 6.52±3.86 |       | 0.425  |        |
|                               | Day 28   | 3.87±2.49 | <0.001 | 6.52±3.87 | 1.000 | 0.004  | 0.005  |
|                               | Day 56   | 2.28±2.36 | <0.001 | 6.27±4.09 | 0.620 | <0.001 | <0.001 |
| Nausea                        | Baseline | 3.69±3.19 |        | 3.30±3.69 |       | 0.444  |        |
|                               | Day 28   | 1.56±2.64 | <0.001 | 2.77±3.54 | 0.174 | 0.015  | 0.100  |
|                               | Day 56   | 0.46±1.14 | <0.001 | 2.70±3.53 | 0.194 | <0.001 | <0.001 |
| Belching                      | Baseline | 5.90±3.40 |        | 5.05±3.66 |       | 0.283  |        |
|                               | Day 28   | 3.18±2.90 | <0.001 | 4.70±3.64 | 0.435 | <0.001 | 0.001  |
|                               | Day 56   | 2.31±2.45 | <0.001 | 4.41±3.96 | 0.167 | <0.001 | <0.001 |
| Vomiting                      | Baseline | 1.59±2.88 |        | 1.07±2.12 |       | 0.667  |        |
|                               | Day 28   | 0.46±1.29 | 0.011  | 0.77±1.67 | 0.368 | 0.261  | 0.088  |
|                               | Day 56   | 0.21±0.73 | 0.004  | 1.25±2.54 | 0.684 | 0.063  | 0.006  |
| Bed breath                    | Baseline | 2.08±2.99 |        | 2.80±3.30 |       | 0.302  |        |
|                               | Day 28   | 0.77±1.46 | 0.002  | 2.23±3.13 | 0.070 | 0.275  | 0.009  |
|                               | Day 56   | 0.36±0.96 | <0.001 | 2.41±3.73 | 0.403 | 0.102  | 0.013  |

\*: Compared within group; p-value for Paired t-test

\*\*: Compared between groups; p-value for Wilcoxon rank sum test

†: Compared between groups; p-value for the generalized linear model adjusted by age, sex, body mass index, smoking, physical activity, alcohol consumption, stress, diet habit, and caffeine intake
